# Supplementary material for: Genomic profiling of CpG methylation and allelic specificity using quantitative high-throughput mass spectrometry: critical evaluation and improvements
Source: PubMed Central journal article supplement — Nucleic Acids Res. 2007 Sep 13;35(18):e119. doi: 10.1093/nar/gkm662 (PMC2094090; doi:10.1093/nar/gkm662), 2007-09-13
Supplement: nar_gkm662_3.pdf [file nar_gkm662_3.pdf]

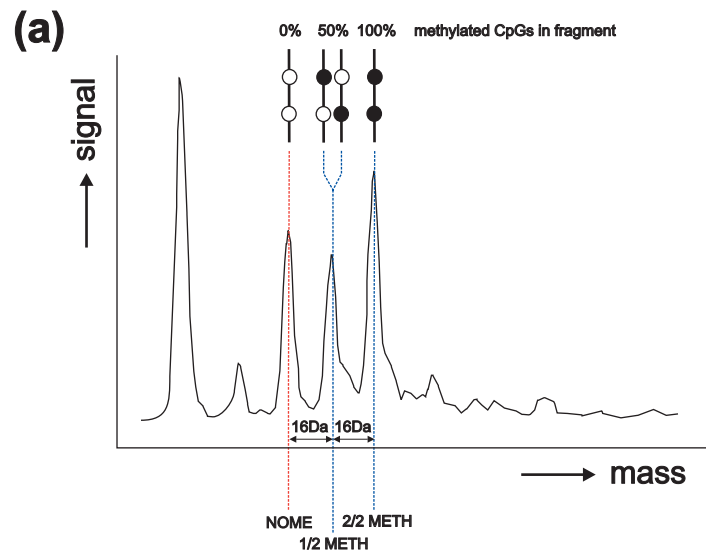

**(b)**

| peak     | SNR    |
|----------|--------|
| NOME     | 50.037 |
| 1/2 METH | 47.883 |
| 2/2 METH | 61.835 |

**(c)**

$$\text{MassCLEAVE} = \frac{(47.883 + 61.835)}{(50.037 + 47.883 + 61.835)} = 0.69$$

$$\text{ASF} = \frac{((0.5 \cdot 47.883) + (1.0 \cdot 61.835))}{(50.037 + 47.883 + 61.835)} = 0.54$$

**Coolen\_Supplementary\_Figure\_1**
