# Supplementary material for: Genomic profiling of CpG methylation and allelic specificity using quantitative high-throughput mass spectrometry: critical evaluation and improvements
Source: PubMed Central journal article supplement — Nucleic Acids Res. 2007 Sep 13;35(18):e119. doi: 10.1093/nar/gkm662 (PMC2094090; doi:10.1093/nar/gkm662), 2007-09-13
Supplement: nar_gkm662_8.pdf [file nar_gkm662_8.pdf]

# SCTR

(a)

PCR replicates on  
bisulphite-treated gDNA

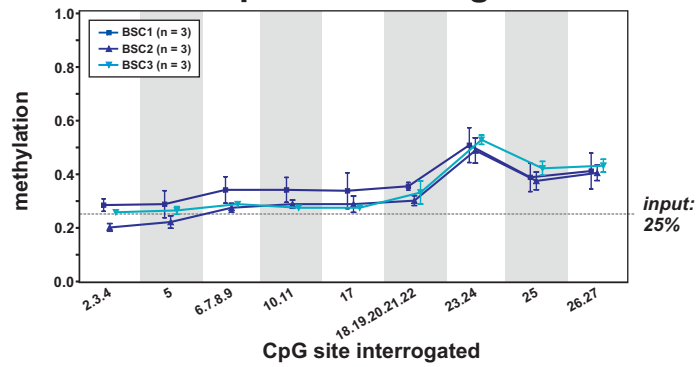

(b)

replicates of bisulphite treatment

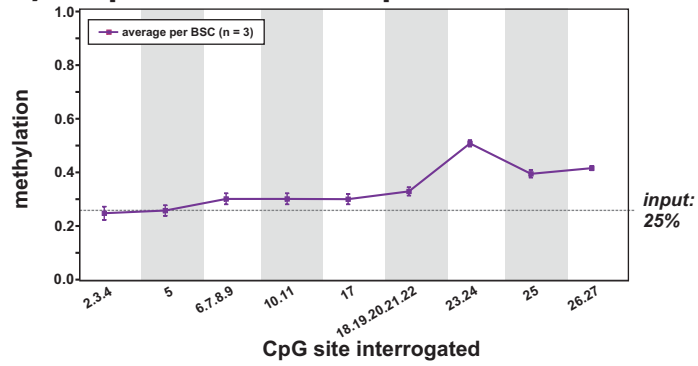

Coolen\_supplementary\_  
Figure\_6
