# Supplementary material for: Genomic profiling of CpG methylation and allelic specificity using quantitative high-throughput mass spectrometry: critical evaluation and improvements
Source: PubMed Central journal article supplement — Nucleic Acids Res. 2007 Sep 13;35(18):e119. doi: 10.1093/nar/gkm662 (PMC2094090; doi:10.1093/nar/gkm662), 2007-09-13
Supplement: nar_gkm662_9.pdf [file nar_gkm662_9.pdf]

# INHBB

## (a) PCR replicates on bisulphite-treated gDNA

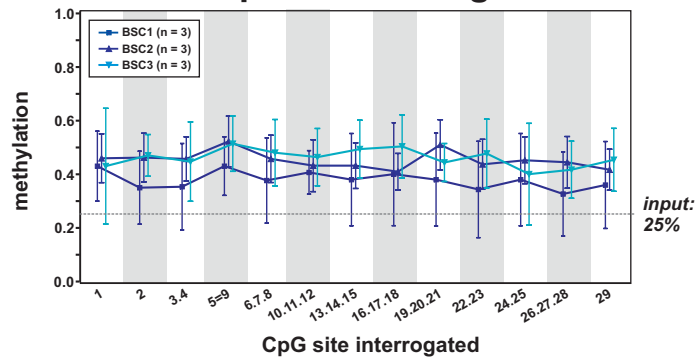

## (b) replicates of bisulphite treatment

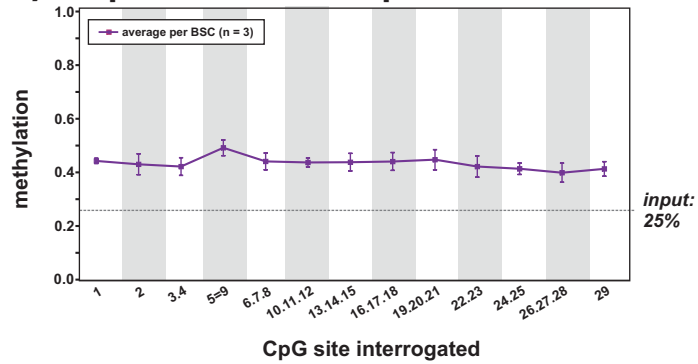

Coolen\_supplementary\_  
Figure\_7
