# Supplementary figures and images for: Genomic profiling of CpG methylation and allelic specificity using quantitative high-throughput mass spectrometry: critical evaluation and improvements
Source: PubMed Central journal article supplement — Nucleic Acids Res. 2007 Sep 13;35(18):e119. doi: 10.1093/nar/gkm662 (PMC2094090; doi:10.1093/nar/gkm662), 2007-09-13

# SCTR

## (a) melt curve analysis

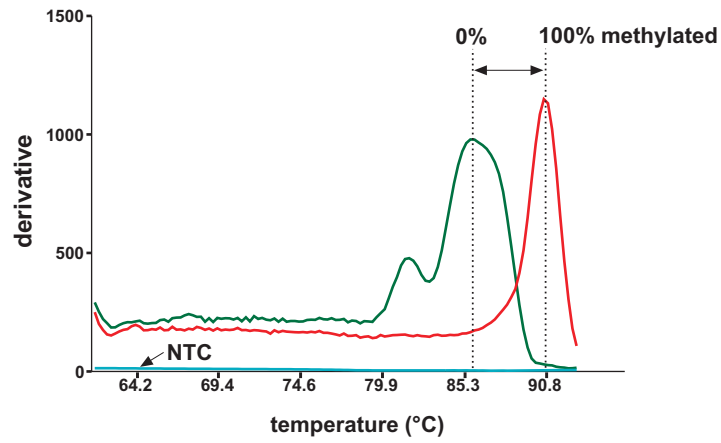

## (b)

### SYBR Green in MassCLEAVE assay

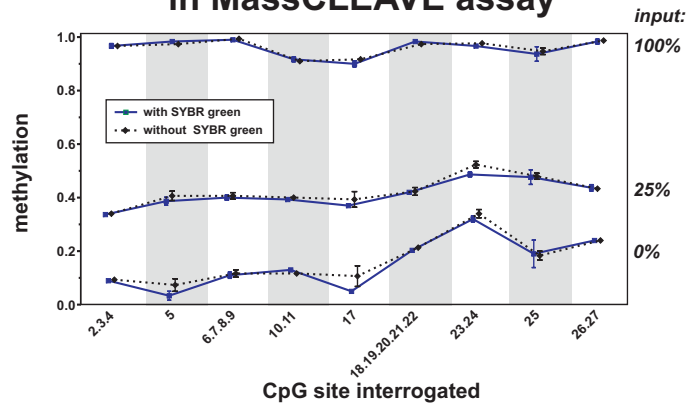

Coolen\_supplementary\_  
Figure\_8

Supplement: nar_gkm662_10.pdf [file nar_gkm662_10.pdf]

# INHBB

## (a) melt curve analysis

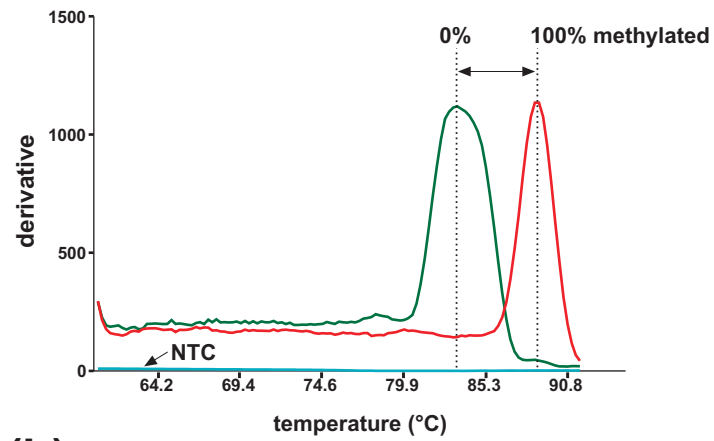

## (b)

### SYBR Green in MassCLEAVE assay

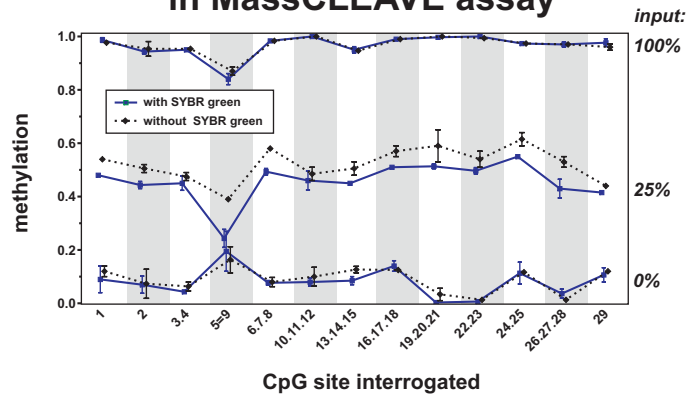

Coolen\_supplementary\_  
Figure\_9

Supplement: nar_gkm662_11.pdf [file nar_gkm662_11.pdf]

(a)

# INHBB

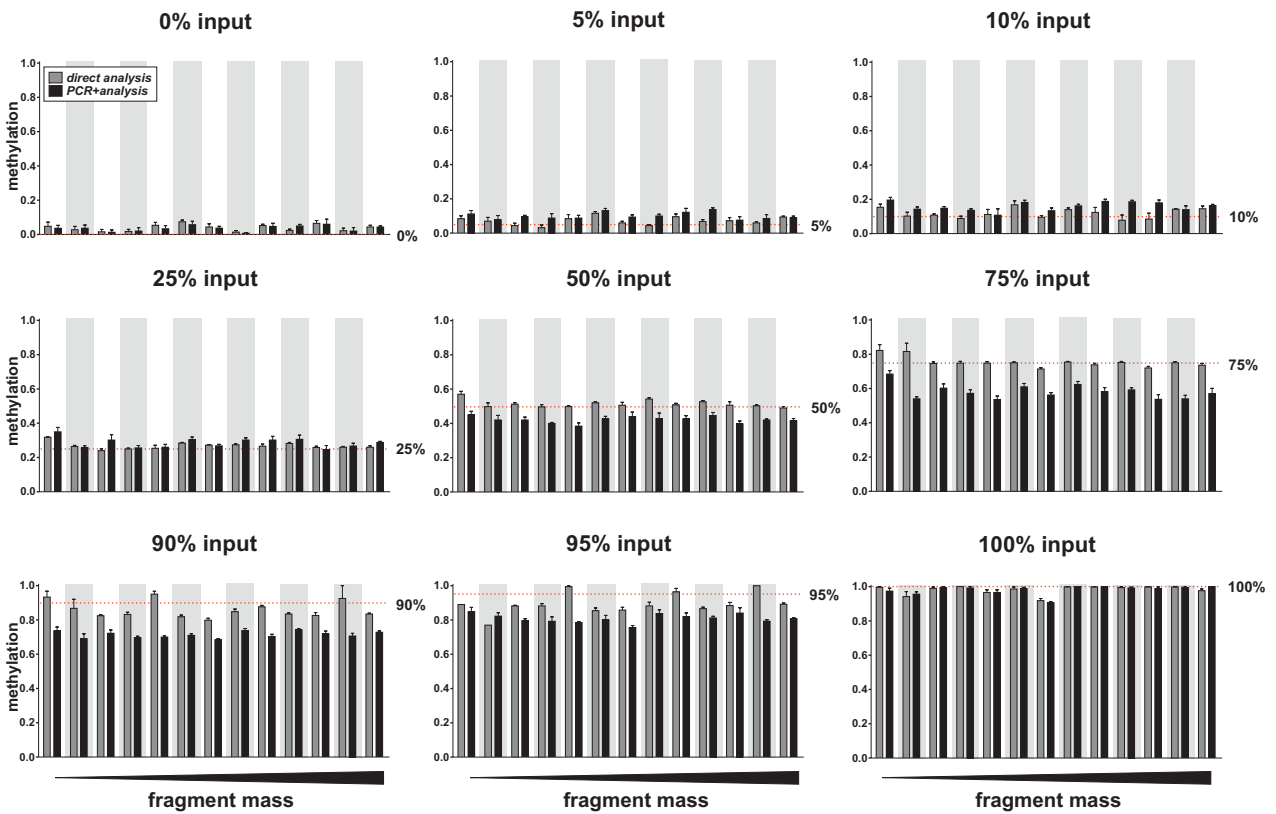

(b)

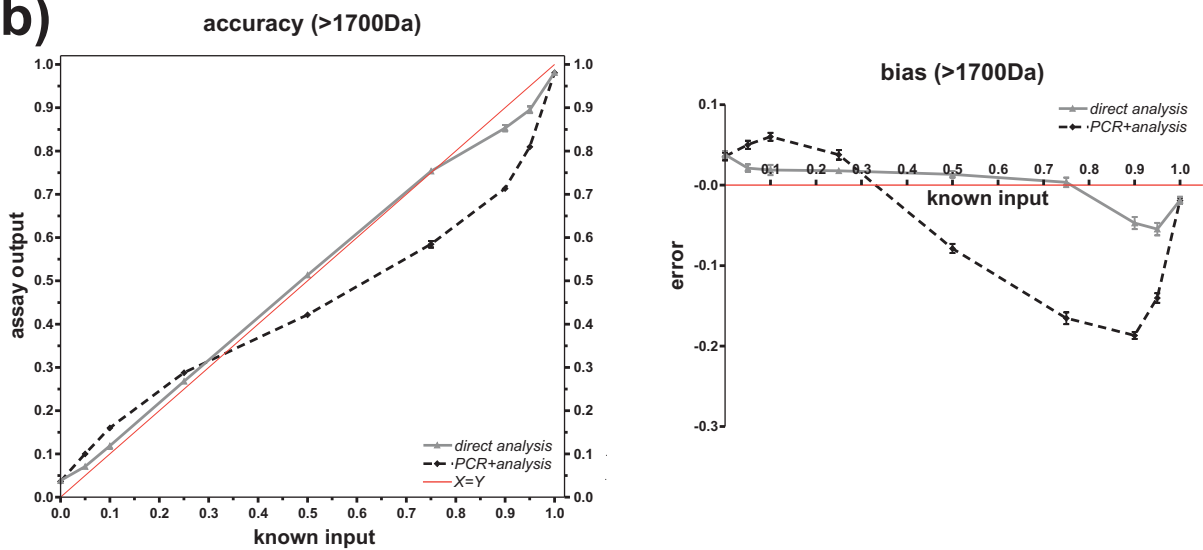

Coolen\_supplementary\_Figure\_3

Supplement: nar_gkm662_5.pdf [file nar_gkm662_5.pdf]

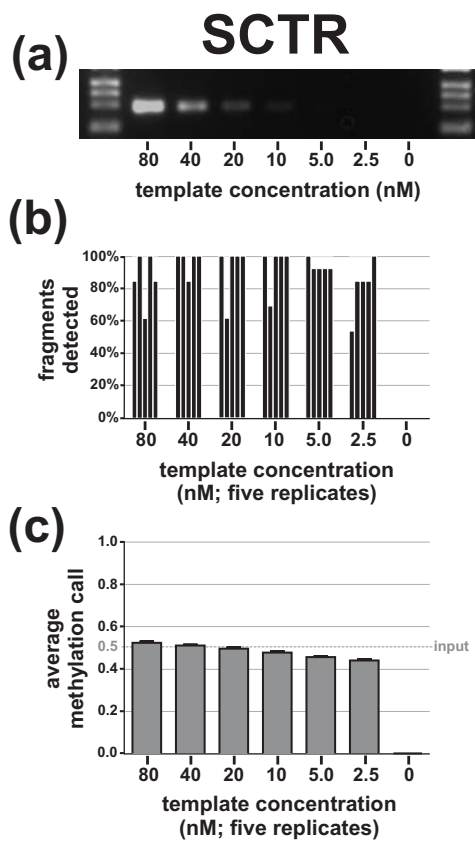

Coolen\_supplementary\_  
Figure\_4

Supplement: nar_gkm662_6.pdf [file nar_gkm662_6.pdf]

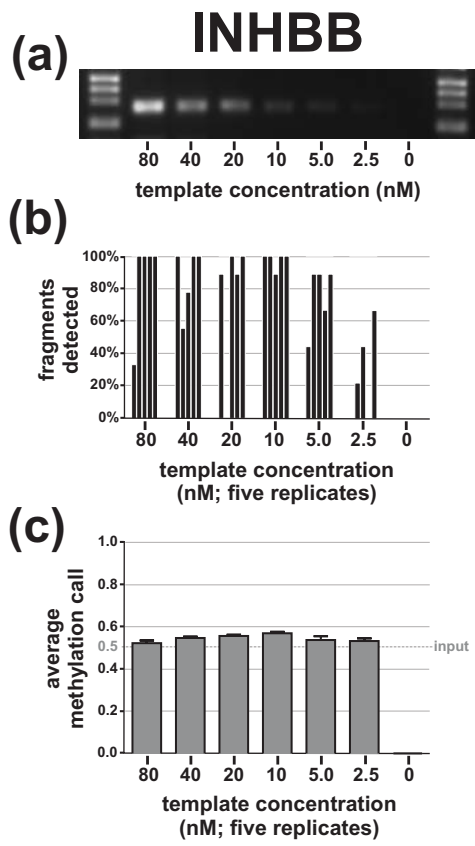

Coolen\_supplementary\_  
Figure\_5

Supplement: nar_gkm662_7.pdf [file nar_gkm662_7.pdf]
